# Supplementary material
Source: PubMed Central journal article supplement (PMC5309872)
Supplement: itxm_a_1170251_sm8092.pdf [file itxm_a_1170251_sm8092.pdf]

### Cell Index Measurement in NHBE using xCELLigence

24 h incubation with PG.G, PG.G/Nic mixtures

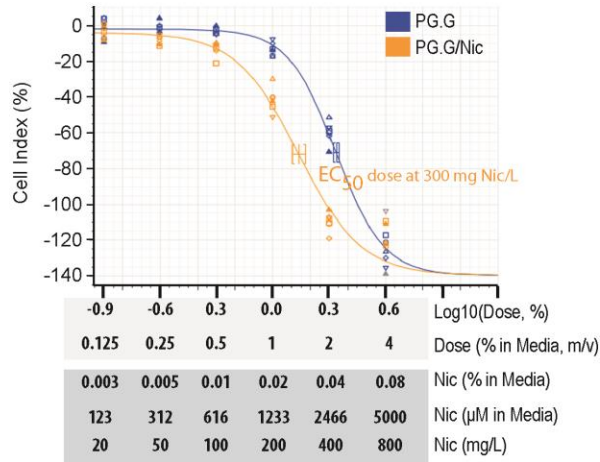

24 h incubation with nicotine only

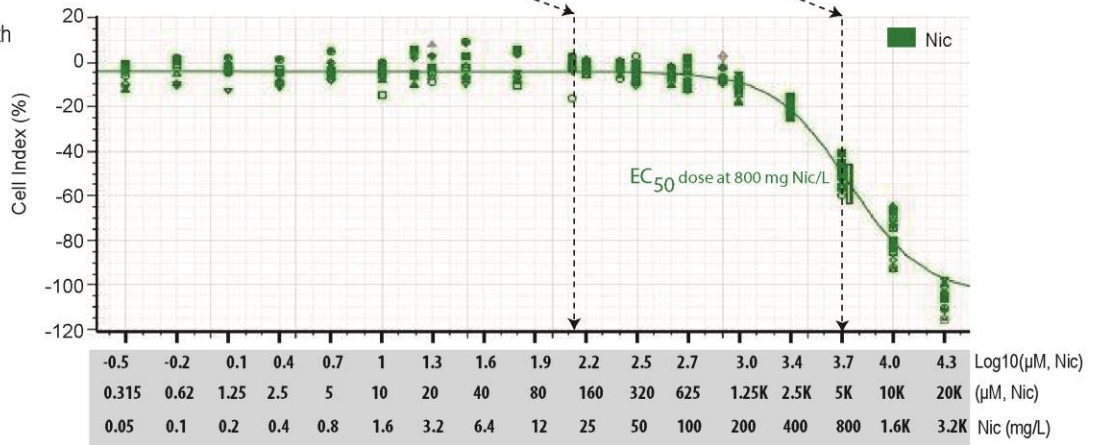

Supplementary Figure 1

Cell Index Measurement in NHBE using xCELLigence

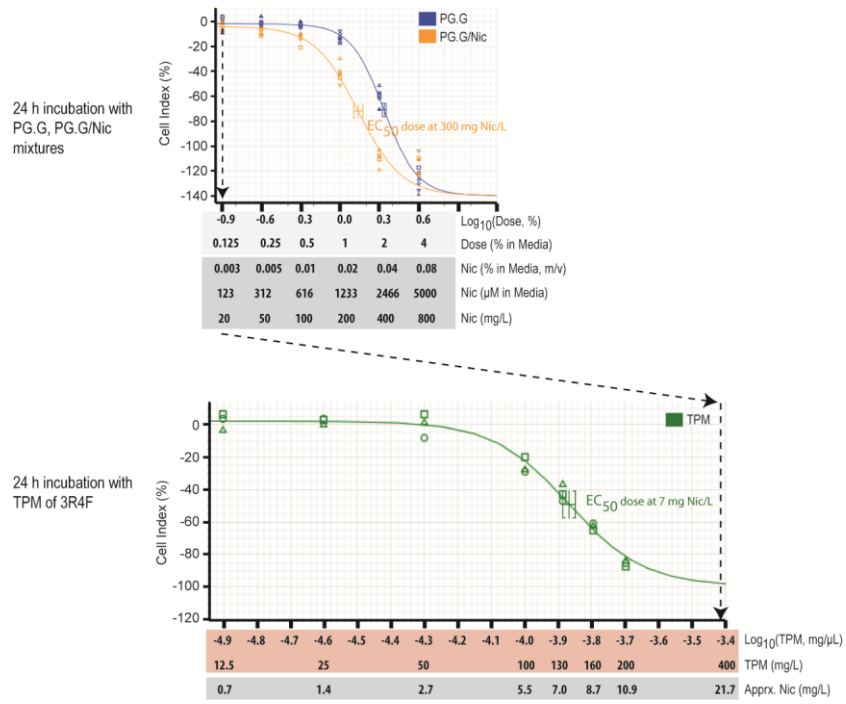

Supplementary Figure 2

**Fold-Changes of Pro-Inflammatory Mediators  
as compared with Air Control**

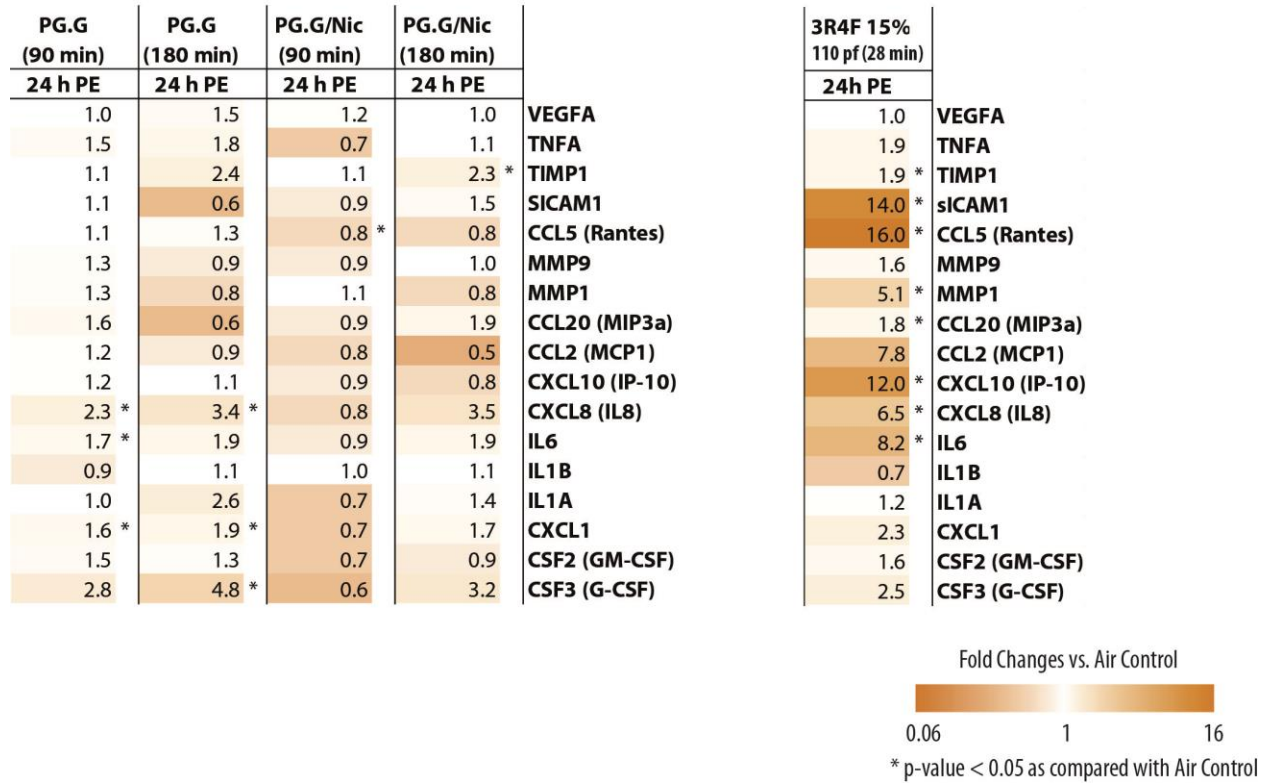

**Supplementary Figure 3**
